# Supplementary material for: Fabrication of Pd/CeO2nanocubes as highly efficient catalysts for degradation of formaldehyde at room temperature
Source: Royal Society of Chemistry journal article supplement (doi:10.1039/d1cy00766a), 2021-01-01
Supplement: d1cy00766a1.pdf [file d1cy00766a1.pdf]

## **Fabrication of Pd/CeO<sub>2</sub> nanocubes as highly efficient catalyst for degradation of formaldehyde at room temperature**

Yafeng Chen<sup>a</sup>, Guimin Jiang<sup>b</sup>, Xiangzhi Cui<sup>c,\*</sup>, Zuotai Zhang<sup>b,\*</sup>, Xinmei Hou<sup>a,\*</sup>

<sup>a</sup>Beijing Advanced Innovation Center for Materials Genome Engineering, Collaborative Innovation Center of Steel Technology, University of Science and Technology Beijing, Beijing 100083, P.R. China

<sup>b</sup>School of Environmental Science and Engineering and Key Laboratory of Municipal Solid Waste Recycling Technology and Management of Shenzhen, Southern University of Science and Technology, Shenzhen 518055, P.R. China

<sup>c</sup>The State Key Laboratory of High Performance Ceramics and Superfine Microstructures, Shanghai Institute of Ceramics, Chinese Academy of Sciences, Shanghai, 200050, China

## Physical characterizations

Pulse CO chemisorption: the CO pulse experiments were carried out with an AutoChem II 2920 apparatus equipped with a TCD detector. Firstly, the catalysts were pretreated at 400 °C for 30 min under He (50 mL min<sup>-1</sup>) with a heating rate of 10 °C min<sup>-1</sup> to remove physically adsorbed water and other impurities. Then, after the temperature was cooled to 50 °C, the samples were reduced under a stream of 10% H<sub>2</sub>/Ar (50 mL min<sup>-1</sup>) at 400 °C for 120 min with a heating rate of 10 °C min<sup>-1</sup>, following by cooling to 45 °C under He (50 mL min<sup>-1</sup>). When the baseline was stabilized, 10% CO/He was used for CO pulse adsorption. The stoichiometry factor for Pd/CO was assumed to be 1 when calculating the metal dispersion.

Electron spin resonance (ESR) measurement: the electron spin resonance signals were characterized on a Bruker A300 ESR instrument at the X-band frequency with a microwave of 1.0 mW at room temperature.

H<sub>2</sub> temperature-programmed reduction (H<sub>2</sub>-TPR): the H<sub>2</sub>-TPR measurement were conducted with an AutoChem II 2920 apparatus equipped with a TCD detector. Firstly, the catalysts were pretreated at 400 °C for 30 min under He (50 mL min<sup>-1</sup>) with a heating rate of 10 °C min<sup>-1</sup>. Then, a mixture of 10% H<sub>2</sub>/Ar (50 mL min<sup>-1</sup>) gas was introduced when the samples were cooled to 50 °C. After stabilizing the baseline, the samples were heated to 400 °C at 10 °C min<sup>-1</sup>.

O<sub>2</sub> temperature-programmed desorption (O<sub>2</sub>-TPD): the O<sub>2</sub>-TPD measurement were conducted with an AutoChem II 2920 apparatus equipped with a TCD detector. Firstly, the catalysts were pretreated at 400 °C for 30 min under He (50 mL min<sup>-1</sup>) with a heating rate of 10 °C min<sup>-1</sup>. After the samples were cooled to 50 °C, a mixture of 3% O<sub>2</sub>/He (50 mL min<sup>-1</sup>) gas was introduced and kept for 60 min. Then, He (50 mL min<sup>-1</sup>) was injected for 60 min. When the baseline was stabilized, the samples were heated to 500 °C at 10 °C min<sup>-1</sup>.

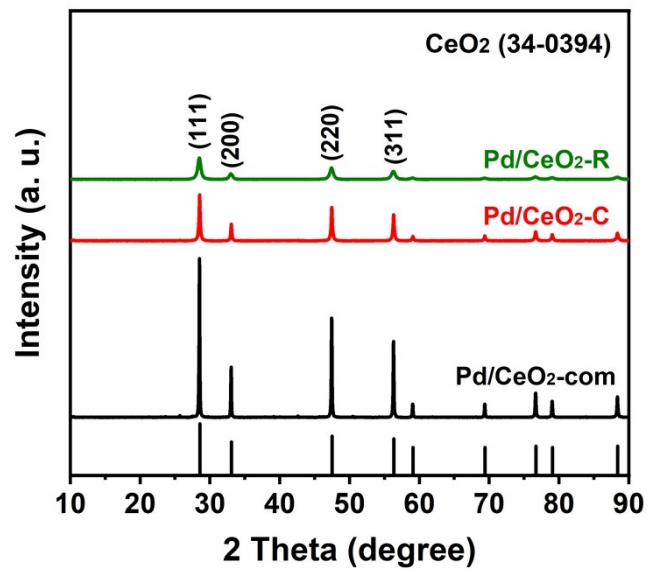

Fig. S1. The XRD patterns of Pd/CeO<sub>2</sub>-C, Pd/CeO<sub>2</sub>-R and Pd/CeO<sub>2</sub>-com catalysts.

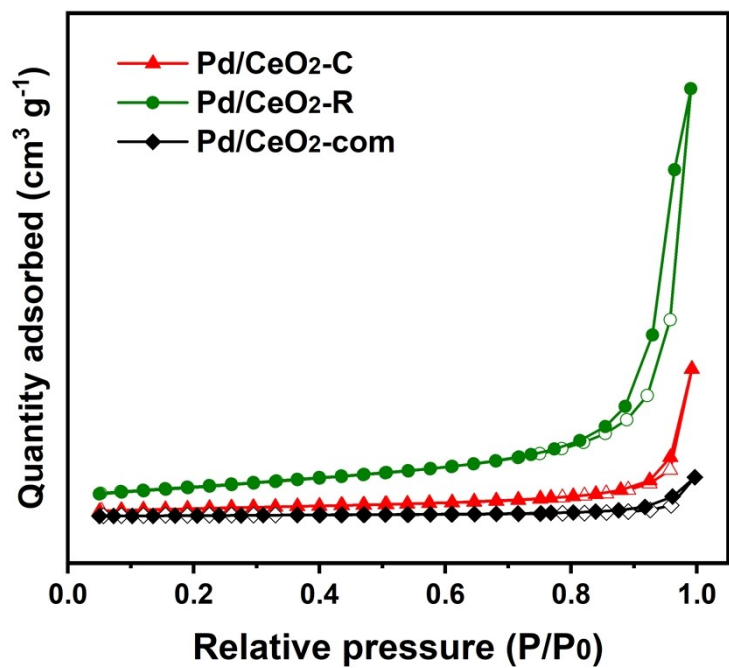

Fig. S2. N<sub>2</sub> adsorption-desorption isotherm plots of Pd/CeO<sub>2</sub>-C, Pd/CeO<sub>2</sub>-R and Pd/CeO<sub>2</sub>-com catalysts.

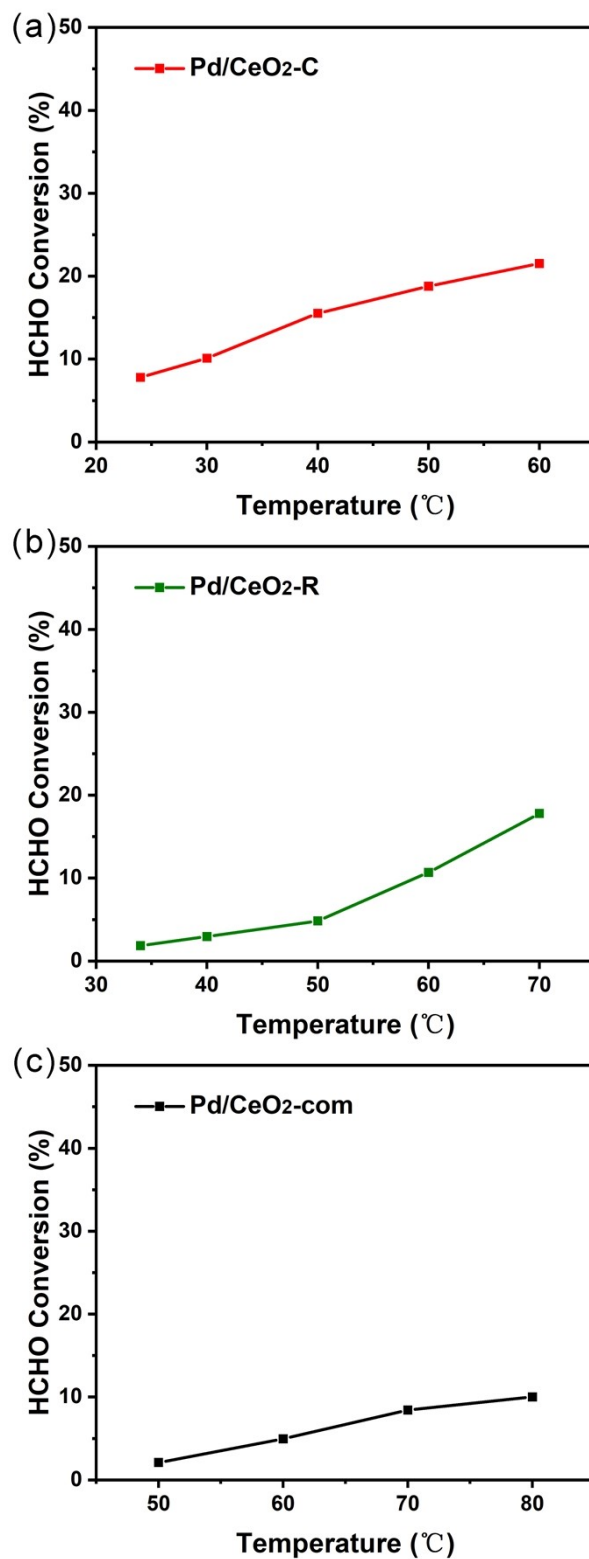

Fig. S3. The kinetic measurement of (a) Pd/CeO<sub>2</sub>-R, (b) Pd/CeO<sub>2</sub>-R, (c) Pd/CeO<sub>2</sub>-com catalysts. The kinetic data were collected at the HCHO conversion below 20% and the reaction rate ( $r_{\text{HCHO}}$ ) was calculated by Eq. (4).

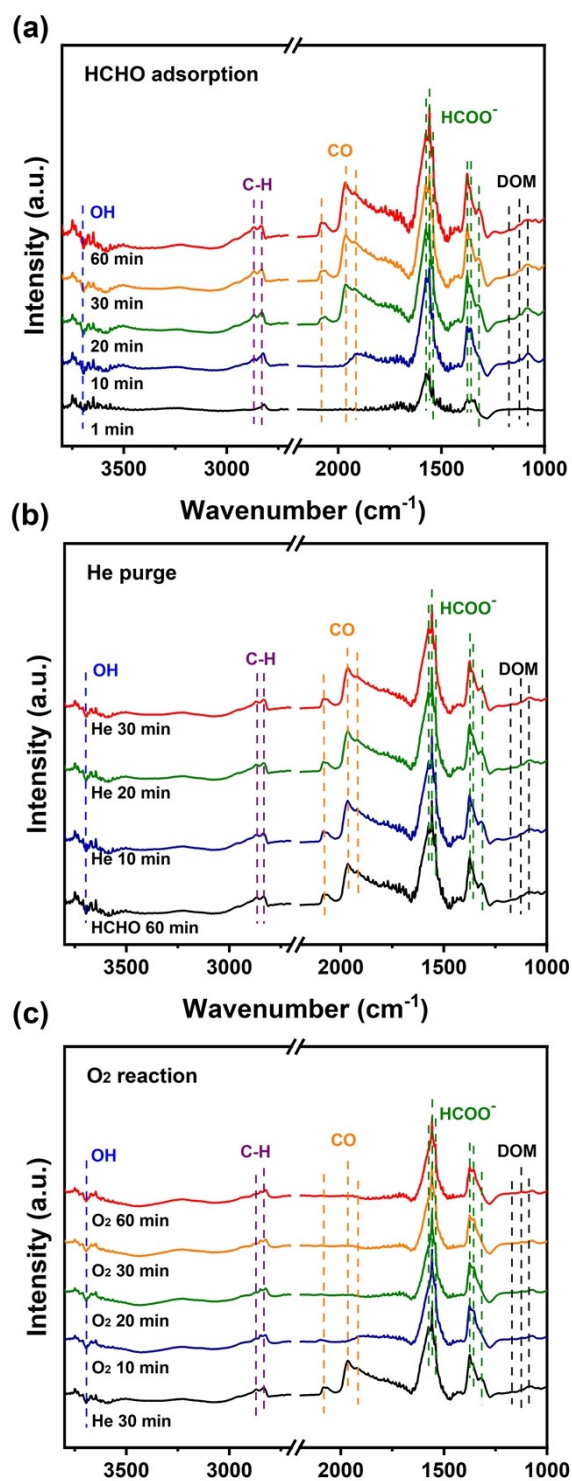

Fig. S4. *In situ* DRIFT spectra (including wavenumber > 2500 cm<sup>-1</sup>) of HCHO reaction process on Pd/CeO<sub>2</sub>-C catalyst: (a) the adsorption process of HCHO; (b) He purging process; (c) O<sub>2</sub> reaction process.

**Table S1.** Performance comparison of HCHO oxidation between Pd/CeO<sub>2</sub>-C catalyst and published results.

| <b>Catalyst</b>                         | <b>Pd loading<br/>(wt.%)</b> | <b>Reaction condition</b>                               | <b>Conversion<br/>(%)</b> | <b>Ref</b> |
|-----------------------------------------|------------------------------|---------------------------------------------------------|---------------------------|------------|
| <b>Pd/TiO<sub>2</sub></b>               | 1                            | 120 ppm HCHO, 25 °C<br>GHSV=100000 h <sup>-1</sup>      | 100                       | [1]        |
| <b>Pd/KTO-NB</b>                        | 1                            | 140 ppm HCHO, 25 °C<br>GHSV=20000 h <sup>-1</sup>       | 100                       | [2]        |
| <b>Pd/TiO<sub>2</sub></b>               | 0.5                          | 100 ppm HCHO, 30 °C<br>WHSV=120000 mL g h <sup>-1</sup> | 100                       | [3]        |
| <b>Pd/@TS-1</b>                         | 0.2                          | 100 ppm HCHO, 25 °C<br>WHSV=100000 mL g h <sup>-1</sup> | 100                       | [4]        |
| <b>Pd/TiO<sub>2</sub></b>               | 1                            | 100 ppm HCHO, 25 °C<br>WHSV=300000 mL g h <sup>-1</sup> | 100                       | [5]        |
| <b>Pd/γ-Al<sub>2</sub>O<sub>3</sub></b> | 0.78                         | 160 ppm HCHO, 25 °C<br>WHSV=100000 mL g h <sup>-1</sup> | 100                       | [6]        |
| <b>Pd/TiO<sub>2</sub></b>               | 0.2                          | 50 ppm HCHO, 25 °C<br>WHSV=24000 mL g h <sup>-1</sup>   | 100                       | [7]        |
| <b>Pd/CeO<sub>2</sub></b>               | 1                            | 100 ppm HCHO, 30 °C<br>WHSV=150000 mL g h <sup>-1</sup> | 89                        | [8]        |
| <b>Pd/CeO<sub>2</sub></b>               | 1                            | 100 ppm HCHO, 30 °C<br>WHSV=150000 mL g h <sup>-1</sup> | 76                        | [9]        |
| <b>Pd/TiO<sub>2</sub></b>               | 1                            | 140 ppm HCHO, 25 °C<br>GHSV=95000 h <sup>-1</sup>       | 100                       | [10]       |
| <b>Pd/CeO<sub>2</sub>-C</b>             | 0.64                         | 200 ppm HCHO, 25 °C<br>GHSV=36000 mL g h <sup>-1</sup>  | RT                        | This work  |

## Reference

- [1] Y. Li, C. Wang, C. Zhang and H. He, *Top. Catal.*, 2020, **63**, 810-816.
- [2] L. Zhou, S. He, Y. Sang, X. Zhang, H. Liu, C. Jia and X. Xu, *Catal. Commun.*, 2020, **142**, 106034.
- [3] M. He, Y. Cao, J. Ji, K. Li and H. Huang, *J. Catal.*, 2021, **396**, 122-135.
- [4] H. Chen, R. Zhang, H. Wang, W. Bao and Y. Wei, *Appl. Catal. B*, 2020, **278**, 119311.
- [5] C. Wang, Y. Li, C. Zhang, X. Chen, C. Liu, W. Weng, W. Shan and H. He, *Appl. Catal. B*, 2021, **282**, 119540.
- [6] N. Xiang, X. Han, Y. Bai, Q. Li, J. Zheng, Y. Li, Y. Hou and Z. Huang, *Mol. Catal.*, 2020, **494**, 111112.
- [7] X. Wang, X. Zou, Z. Rui, Y. Wang and H. Ji, *AlChE J.*, 2020, **66**.
- [8] K. Li, J. Ji, H. Huang and M. He, *Chemosphere*, 2020, **246**, 125762.
- [9] K. Li, J. Ji, M. He and H. Huang, *Catal. Sci. Technol.*, 2020, **10**, 6257-6265.
- [10] Y. Li, C. Zhang, J. Ma, M. Chen, H. Deng and H. He, *Appl. Catal. B*, 2017, **217**, 560-569.
